# Supplementary material for: An organic plastic ferroelectric with high Curie point
Source: Royal Society of Chemistry journal article supplement (doi:10.1039/d1sc06781h), 2021-12-24
Supplement: d1sc06781h1.pdf [file d1sc06781h1.pdf]

## Electronic Supplementary Information

### An Organic Plastic Ferroelectric with High Curie Point.

Yong Ai, Peng-Fei Li, Meng-Juan Yang, Yu-Qiu Xu, Meng-Zhen Li, and Ren-Gen Xiong\*

**Experimental details.** (-)-Camphanic acid was purchased from Leyan company (<https://www.leyan.com>) and purified by recrystallization prior to the measurements.

**Single-crystal diffraction.** The variable temperature single crystal X-ray diffraction (XRD) data was carried out by using a Rigaku Oxford diffractometer with MoK $\alpha$  radiation ( $\lambda = 0.71073 \text{ \AA}$ ). The test sample should be a high-quality single crystal that has just been precipitated. The direct method was used to solve the crystal structure at various temperatures, and the SHELXTL-2014 program package was used to correct it by the full-matrix least-squares method. For all non-hydrogen atoms, their anisotropy is refined. All hydrogen atoms are generated geometrically and at the same time in proper positions.

**PXRD.** Variable-temperature powder X-ray diffraction measurements were performed on a Rigaku D/MAX 2000 PC X-ray diffractometer. The measurement condition is in a  $2\theta$  range of  $5^\circ$ – $50^\circ$ , the step size is  $0.02^\circ$ , and the corresponding PXRD pattern is obtained.

**Differential scanning calorimetry (DSC)** The DSC measurement is performed by using a PerkinElmer Diamond DSC instrument. Added the power sample to an alumina crucible and cover it. Then the powder sample was studied in by heating and cooling with a rate of  $20 \text{ K min}^{-1}$  at nitrogen atmosphere.

**Second Harmonic Generation (SHG).** The SHG measurements was carried on the FLS 920, Edinburgh Instruments and the laser of Vibrant 355 II, OPOTEK (wavelength 1064 nm, pulse Nd:YAG).

**PFM measurements.** The ferroelectric domain structures were performed on a commercial atomic force microscope system (MFP-3D, Asylum Research). Conductive Pt/Ir-coated silicon probes (EFM-50, Nanoworld) were used for domain imaging and polarization switching studies. Resonant-enhanced PFM mode was used to enhance the signal, with the ac voltage frequency of about 330-380 kHz. The as-grown thin films of *R*- or *S*-DMIO on ITO-coated glass, was used for the PFM measurements. Specifically, 20  $\mu\text{L}$  of ethanol solution of *R*- or *S*-DMIO (20 mg per 200  $\mu\text{L}$ ) was dripped onto a  $1 \text{ cm} \times 1 \text{ cm}$  ITO glass sheet, and the solvent was volatilized at room temperature to grow a smooth crystal film.

**Thermogravimetric analysis (TGA).** The TGA measurement was performed by using a PerkinElmer TGA 8000.

**Polarization-Electric Field (*P-E*) Hysteresis Loops.** *P-E* hysteresis loops measurements were recorded using the double-wave method at 298 K. The double-wave method was carried out with a homemade system, including a high voltage amplifier (Trek 623B), waveform generator (Agilent 33521A), and low-current electrometer (Keithley 6514). The measuring frequency was 0.033 Hz.

**Table. S1** Crystal data and structure refinements for (-)-Camphanic acid at various temperature.

| <b>(<i>S</i>)-(-)Camphanic acid</b> |                                                |                                                |
|-------------------------------------|------------------------------------------------|------------------------------------------------|
| Temperature                         | 100K                                           | 373K                                           |
| Formula                             | C <sub>10</sub> H <sub>14</sub> O <sub>4</sub> | C <sub>10</sub> H <sub>14</sub> O <sub>4</sub> |
| weight                              | 198.21                                         | 198.21                                         |
| Crystal system                      | monoclinic                                     | monoclinic                                     |
| Space group                         | <i>P</i> 2 <sub>1</sub>                        | <i>P</i> 2 <sub>1</sub>                        |
| <i>a</i> (Å)                        | 6.29835(9)                                     | 6.3879(2)                                      |
| <i>b</i> (Å)                        | 10.64131(14)                                   | 10.8484(3)                                     |
| <i>c</i> (Å)                        | 7.53892(11)                                    | 7.6137(3)                                      |
| $\alpha$ (°)                        | 90                                             | 90                                             |
| $\beta$ (°)                         | 103.5036(14)                                   | 103.203(3)                                     |
| $\gamma$ (°)                        | 90                                             | 90                                             |
| Volume /Å <sup>3</sup>              | 491.311(12)                                    | 513.67(3)                                      |
| <i>Z</i>                            | 2                                              | 2                                              |
| Density/g cm <sup>-3</sup>          | 1.340                                          | 1.281                                          |
| <i>R</i> <sub>1</sub>               | 0.0217                                         | 0.0544                                         |
| <i>wR</i> <sub>2</sub>              | 0.0587                                         | 0.2892                                         |
| GOF                                 | 1.09                                           | 1.416                                          |

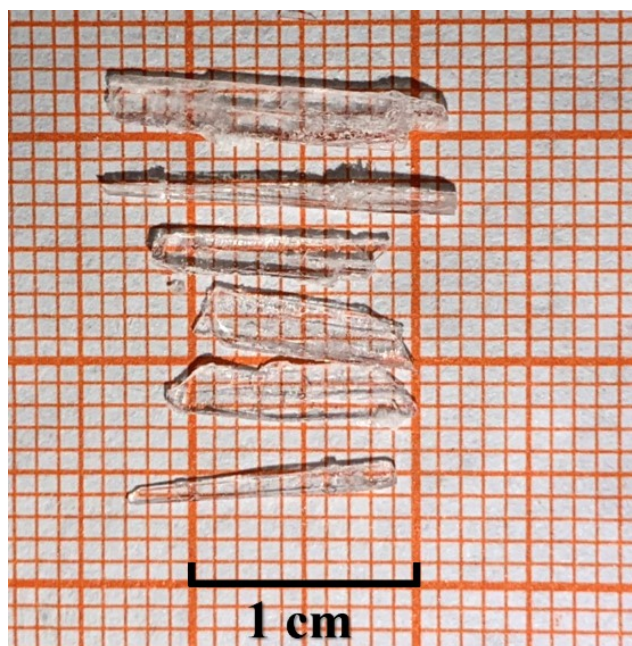

**Figure S1.** Crystal picture of (-)-Camphanic acid.

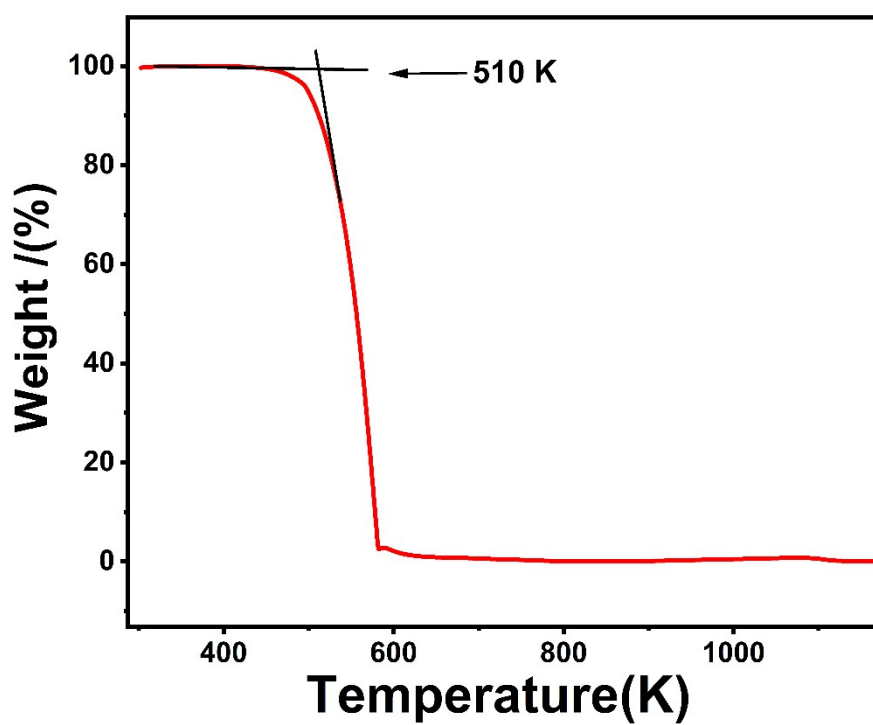

**Figure S2.** TGA plot of (-)-Camphanic acid.

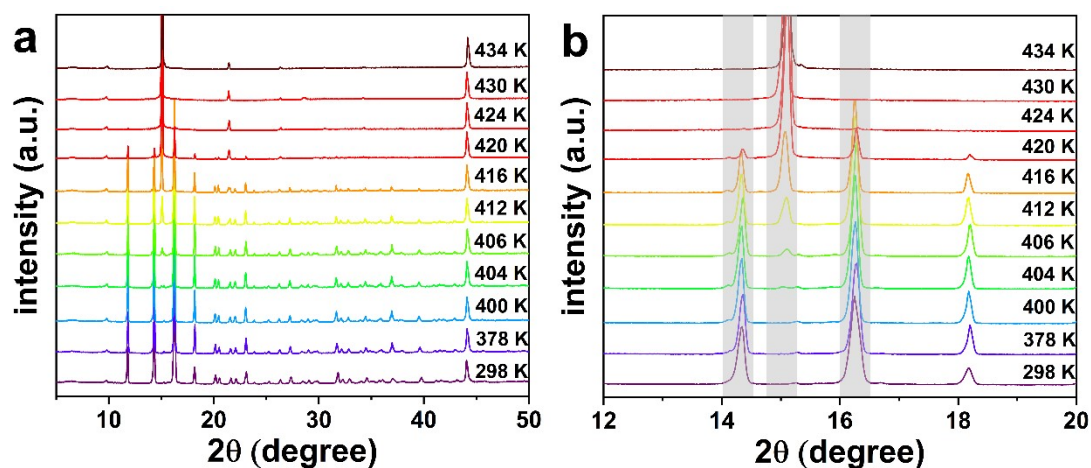

**Figure S3.** (a) Measured powder X-ray diffraction patterns of (-)-Camphanic acid at various temperature. (b) zoom in (a) between 12 and 20 degrees. The shaded area indicates the characteristic peaks.

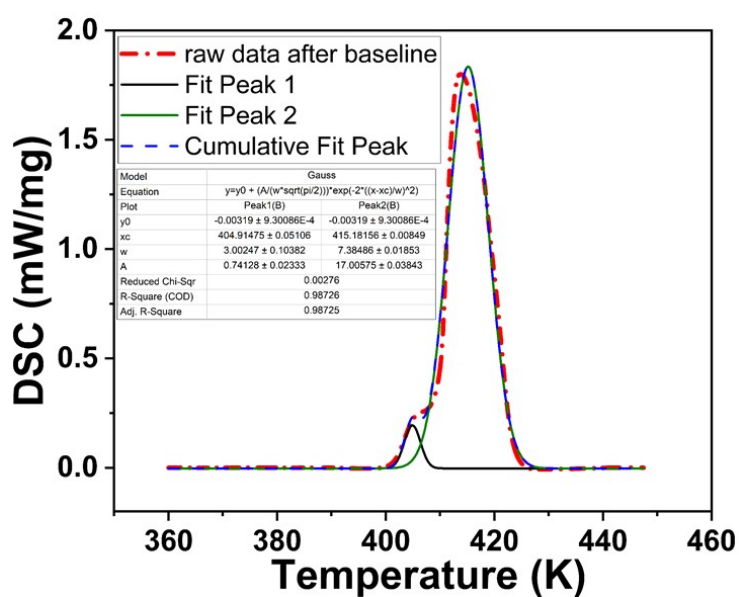

**Figure S4.** The endothermic peak upon heating. It splits into two parts through Gauss Fit. The integration area of the Fit peak 2 is taken as the entropy changes for the plastic phase transition.

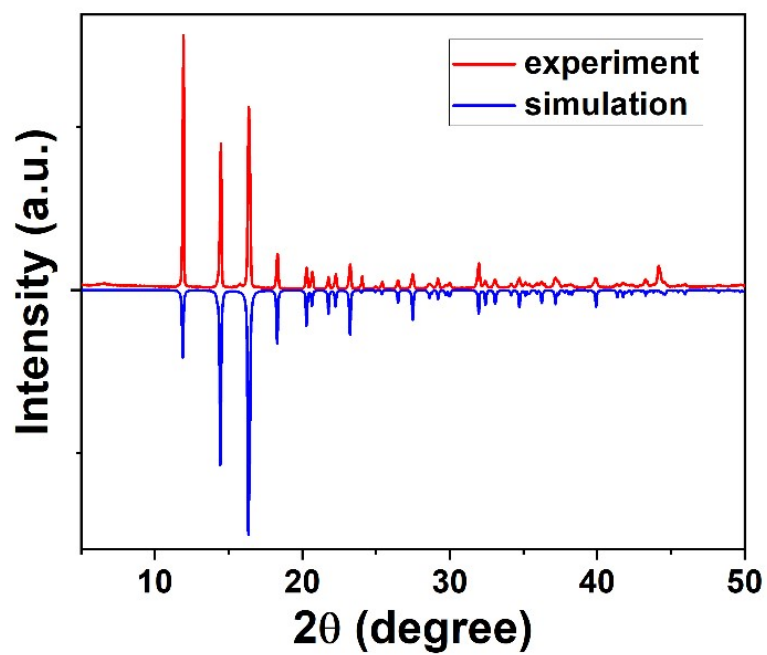

**Figure S5.** Measured and simulated powder X-ray diffraction patterns of (-)-Camphanic acid.

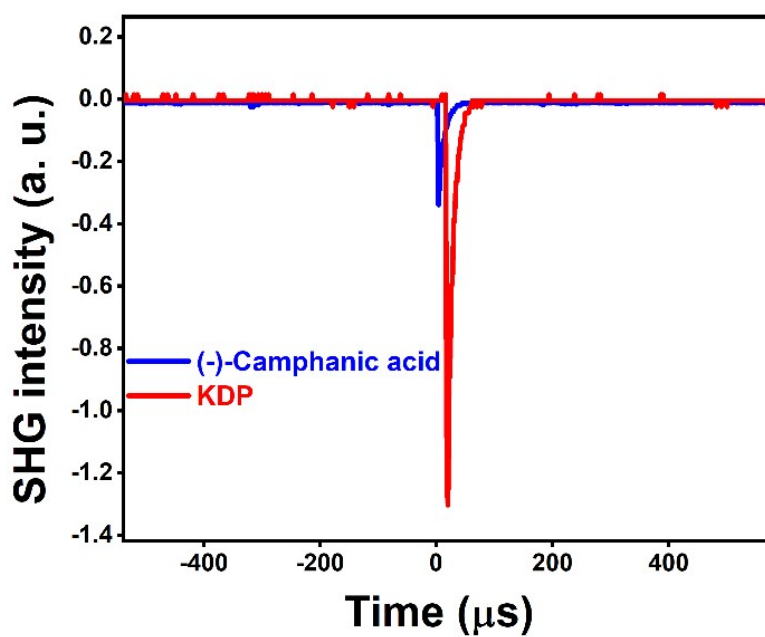

**Figure S6.** Oscilloscope traces of the SHG signals of (-)-Camphanic acid and KDP at room temperature.

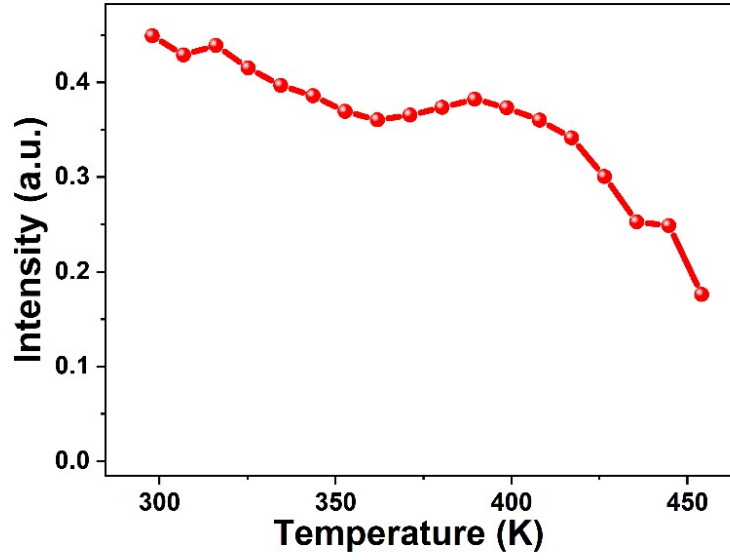

**Figure S7.** Temperature dependent SHG measurement of (-)-Camphanic acid.

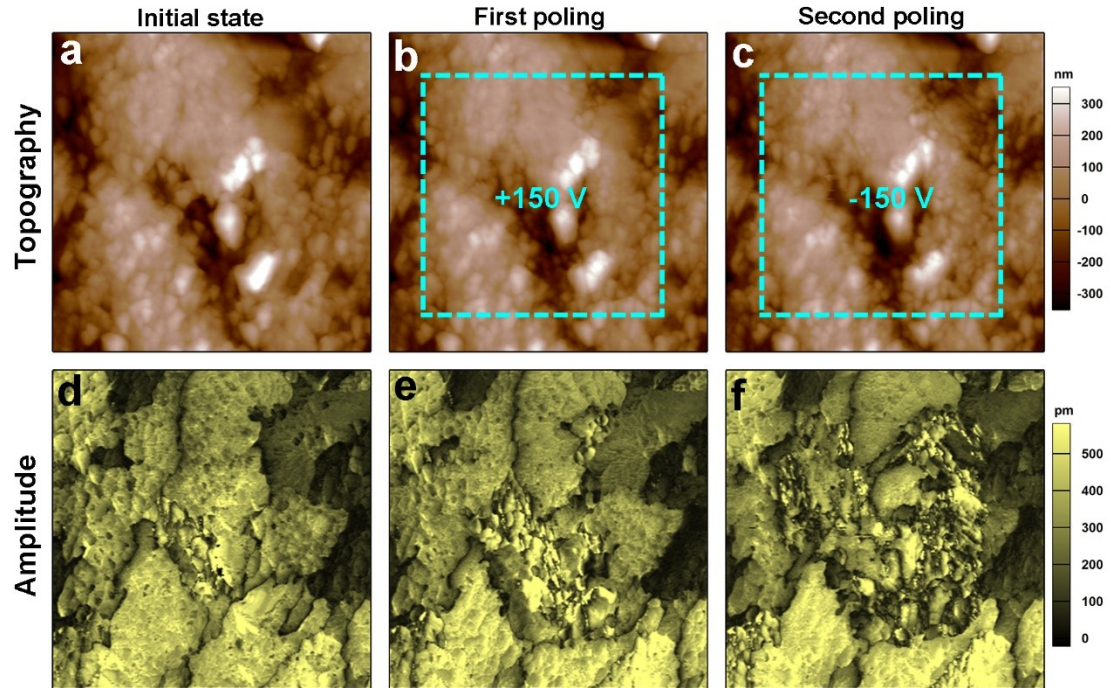

**Figure S8.** Detailed PFM information for the domain switching measurements. (a-c) Topographic and (d-f) amplitude images of the initial state (a, d), after poling the blue box region with tip voltage of +150 V (b, e) and after poling the same region with tip voltage of -150 V (c, f).
